# Supplementary material
Source: MDPI journal article supplement (https://www.mdpi.com/2079-6412/14/5/540)
Supplement: s1 [file s1]

---

## **Supplementary Materials**

**Analytical Study of Polychrome Clay Sculptures  
in Five-Dragon Taoist Palace of Wudang, China**

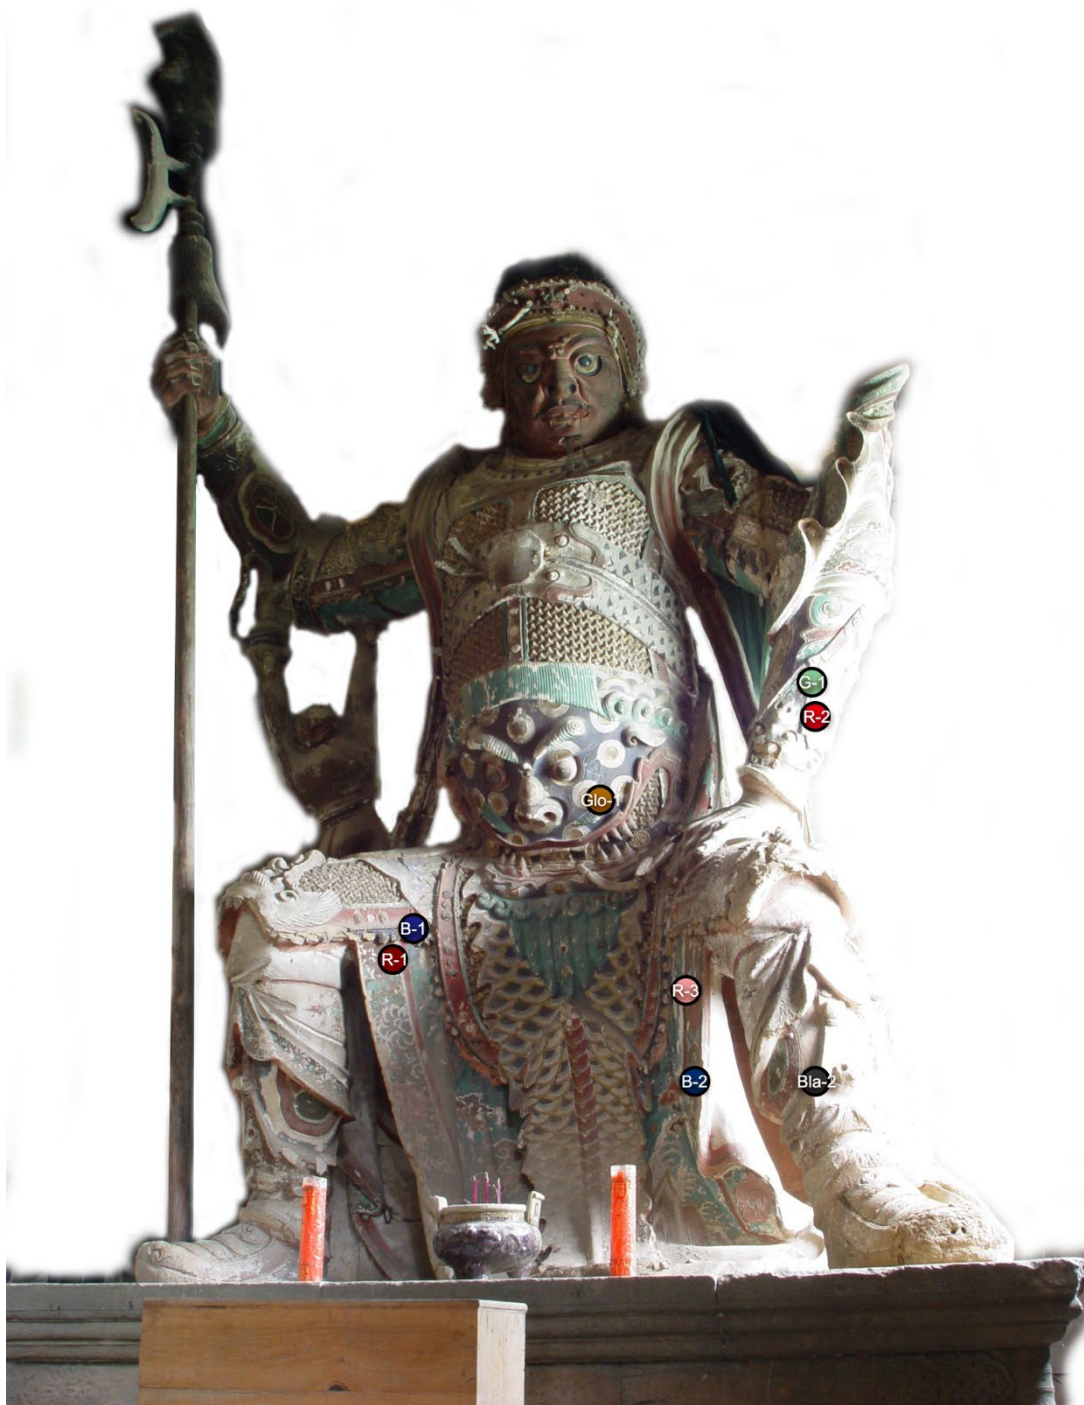

**Figure S1** The sampling locations in Azure God sculpture.

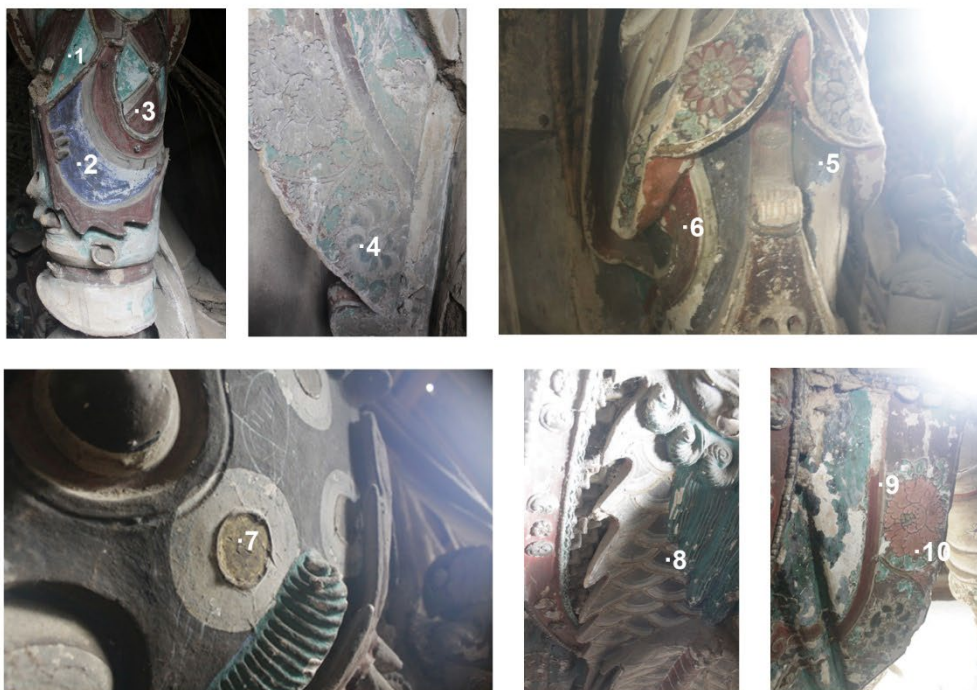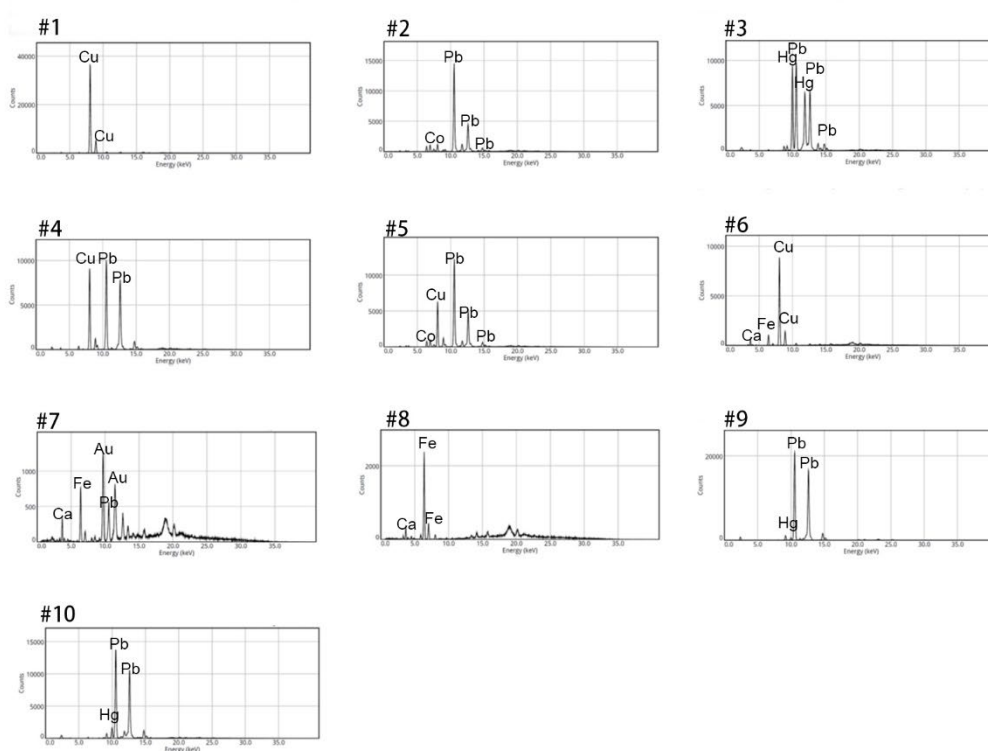

**Figure S2** Visible light photography with the points analyzed with XRF and the corresponding XRF spectra of selected areas.

**Table S1** The normalized elemental concentration measure by using p-XRF.

| The normalized concentration (%) |       |       |       |       |       |      |      |      |      |
|----------------------------------|-------|-------|-------|-------|-------|------|------|------|------|
|                                  | Cu    | Ca    | Pb    | Fe    | Sb    | Ni   | Zn   |      |      |
| #1                               | 85.47 | 11.75 | 1.66  | 0.73  | 0.17  | 0.17 | 0.07 |      |      |
|                                  | K     | Pb    | As    | Fe    | Ca    | Co   | Ni   | Bi   |      |
| #2                               | 32.25 | 24.01 | 17.23 | 8.31  | 8.00  | 7.21 | 1.71 | 1.28 |      |
|                                  | Pb    | Hg    | Ca    | K     | Fe    | Zn   |      |      |      |
| #3                               | 44.86 | 41.02 | 11.01 | 2.21  | 0.78  | 0.12 |      |      |      |
|                                  | Pb    | Cu    | Ca    | Fe    |       |      |      |      |      |
| #4                               | 46.94 | 35.68 | 17.07 | 0.31  |       |      |      |      |      |
|                                  | Pb    | K     | Cu    | Ca    | As    | Fe   | Co   | Ni   | Bi   |
| #5                               | 22.63 | 22.50 | 20.75 | 11.40 | 10.67 | 5.42 | 4.57 | 1.02 | 1.02 |
|                                  | Ca    | Cu    | K     | Fe    | Ti    | Pb   |      |      |      |
| #6                               | 47.27 | 30.52 | 12.30 | 8.00  | 1.42  | 0.51 |      |      |      |
|                                  | Ca    | Fe    | K     | Au    | Pb    | Ti   | As   | Cu   |      |
| #7                               | 62.76 | 13.44 | 12.21 | 7.40  | 2.10  | 1.48 | 0.37 | 0.25 |      |
|                                  | Ca    | Fe    | K     | Ti    | Mn    |      |      |      |      |
| #8                               | 44.47 | 29.82 | 20.05 | 3.68  | 1.97  |      |      |      |      |
|                                  | Pb    | Hg    | K     | Ca    | Cd    | Sn   | Fe   |      |      |
| #9                               | 93.67 | 2.12  | 1.70  | 0.98  | 0.69  | 0.45 | 0.40 |      |      |
|                                  | Pb    | Ca    | Hg    | K     | Fe    | Cu   |      |      |      |
| #10                              | 73.83 | 9.59  | 8.29  | 6.19  | 1.90  | 0.20 |      |      |      |

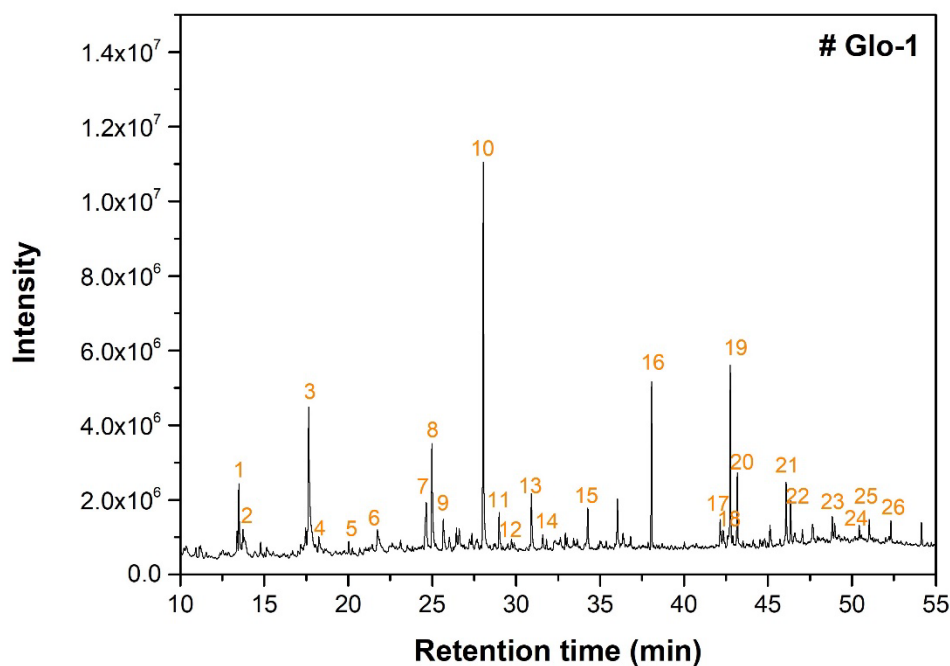

**Figure S3** Total ion chromatograms (TIC) of sample #Glo-1.

**Table S2** the information of the pyrolysis products of sample #Glo-1.

| #  | RT/min        | Pyrolysis products identified                                          | Formula              | Area/%  |
|----|---------------|------------------------------------------------------------------------|----------------------|---------|
| 1  | 13.483        | 1,2-Ethanediamine, N,N,N',N'-tetramethyl-                              | $C_6H_{16}N_2$       | 3.980%  |
| 2  | 13.721        | Octanoic acid, methyl ester                                            | $C_9H_{18}O_2$       | 5.222%  |
| 3  | 17.651        | L-Aspartic acid, N,N-dimethyl-, dimethyl ester                         | $C_8H_{15}NO_4$      | 14.126% |
| 4  | 18.252        | Deoxyspergualin                                                        | $C_{17}H_{37}N_7O_3$ | 1.113%  |
| 5  | 20.030        | 1-Pyridinepropanoic acid, hexahydro-3-(hydroxymethyl)-                 | $C_9H_{17}NO_3$      | 0.647%  |
| 6  | 21.736/26.451 | Pyrrolizin-1,7-dione-6-carboxylic acid, methyl(ester)                  | $C_9H_{11}NO_4$      | 2.379%  |
| 7  | 24.626        | 11,13-Dihydroxy-tetradec-5-enoic acid, methyl ester                    | $C_{15}H_{28}O_4$    | 4.241%  |
| 8  | 24.983        | Octanedioic acid, dimethyl ester                                       | $C_{10}H_{18}O_4$    | 6.582%  |
| 9  | 25.655        | 9-Octadecen-12-ynoic acid, methyl ester                                | $C_{19}H_{32}O_2$    | 2.593%  |
| 10 | 28.045        | Nonanedioic acid, dimethyl ester                                       | $C_{11}H_{20}O_4$    | 21.719% |
| 11 | 28.984        | Dimethyl 2-methylnonane-1,9-dioate                                     | $C_{12}H_{22}O_4$    | 2.367%  |
| 12 | 29.734        | 9,10-Secocholesta-5,7,10(19)-triene-3,24,25-triol, (3 $\beta$ ,5Z,7E)- | $C_{27}H_{44}O_3$    | 0.602%  |
| 13 | 30.905        | Decanoic acid, 10-chloro-10-oxo-, methyl ester                         | $C_{11}H_{19}ClO_3$  | 3.935%  |
| 14 | 31.583        | 9,12,15-Octadecatrienoic acid, 2,3-dihydroxypropyl ester, (Z,Z,Z)-     | $C_{21}H_{36}O_4$    | 0.996%  |
| 15 | 34.282        | Aleuritic acid, methyl ester, trimethyl ether                          | $C_{20}H_{40}O_5$    | 2.822%  |
| 16 | 38.064        | Hexadecanoic acid, methyl ester                                        | $C_{17}H_{34}O_2$    | 7.111%  |
| 17 | 42.149        | 16-Octadecenoic acid, methyl ester                                     | $C_{19}H_{36}O_2$    | 1.630%  |

|    |               |                                                                                                                                                                                         |                    |        |
|----|---------------|-----------------------------------------------------------------------------------------------------------------------------------------------------------------------------------------|--------------------|--------|
| 18 | 42.304        | Octadecanoic acid, 4-hydroxy-, methyl ester                                                                                                                                             | $C_{19}H_{38}O_3$  | 1.360% |
| 19 | 42.755        | Methyl stearate                                                                                                                                                                         | $C_{19}H_{38}O_2$  | 0.569% |
| 20 | 43.178        | Nonanoic acid, 9-(o-propylphenyl)-, methyl ester                                                                                                                                        | $C_{19}H_{30}O_2$  | 3.826% |
| 21 | 45.110        | Pregnan-20-one, 3,11,17,21-tetrahydroxy-, (3 $\alpha$ ,5 $\beta$ ,11 $\beta$ )-                                                                                                         | $C_{21}H_{34}O_5$  | 1.657% |
| 22 | 46.073/46.329 | Oxiraneoctanoic acid, 3-octyl-, cis-                                                                                                                                                    | $C_{18}H_{34}O_3$  | 4.190% |
| 23 | 48.820        | d-Allo-dec-2-enonic acid, 5,8-anhydro-2,3,4,9-tetradecoxy-8-C-(hydroxymethyl)-3-methyl-7,8-O-(1-methylethylidene)-, methyl ester, 10-acetate, (E)-                                      | $C_{18}H_{28}O_8$  | 1.865% |
| 24 | 50.432        | 4a,7b-Dihydroxy-3-(hydroxymethyl)-1,1,6,8-tetramethyl-9a-((2-methylpropanoyl)oxy)-5-oxo-1a,1b,4,4a,5,7a,7b,8,9,9a-decahydro-1H-cyclopropa[3,4]benzo[1,2-e]azulen-9-yl 2-methylbutanoate | $C_{29}H_{42}O_8$  | 0.996% |
| 25 | 51.026        | 3'H-Cycloprop[1,2]androsta-1,4,6-triene-3,17-dione, 1'-carboethoxy-1'-cyano-1 $\beta$ ,2 $\beta$ -dihydro-                                                                              | $C_{24}H_{27}NO_4$ | 1.155% |
| 26 | 52.317        | 4a,7b-Dihydroxy-3-(hydroxymethyl)-1,1,6,8-tetramethyl-9a-((2-methylpropanoyl)oxy)-5-oxo-1a,1b,4,4a,5,7a,7b,8,9,9a-decahydro-1H-cyclopropa[3,4]benzo[1,2-e]azulen-9-yl 2-methylbutanoate | $C_{29}H_{42}O_8$  | 1.143% |

**Table S3** the information of the pyrolysis products of sample #R-1.

| No. | RT/min            | Pyrolysis products identified                                                               | Formula                 | Area/% |
|-----|-------------------|---------------------------------------------------------------------------------------------|-------------------------|--------|
| 1   | 7.252             | 3-[N-[2-Diethylaminoethyl]-1-cyclopentenylamino]propionitrile                               | $C_{14}H_{25}N_3$       | 9.164  |
| 2   | 13.673            | N-[3-[N-Aziridyl]propylidene]-3-dimethylaminopropylamine                                    | $C_{10}H_{21}N_3$       | 1.958  |
| 3   | 17.687            | Methenamine                                                                                 | $C_6H_{12}N_4$          | 23.316 |
| 4   | 19.833<br>/21.796 | Pyrrolizin-1,7-dione-6-carboxylic acid, methyl(ester)                                       | $C_9H_{11}NO_4$         | 0.394  |
| 5   | 21.213            | Deoxyspergualin                                                                             | $C_{17}H_{37}N_7O_3$    | 1.022  |
| 6   | 22.646            | Acetamide, N-methyl-N-[4-[4-fluoro-1-hexahydropyridyl]-2-butyryl]-                          | $C_{12}H_{19}FN_2O$     | 1.940  |
| 7   | 26.041/26.891     | 2,4,5,6,7-Pentamethoxyheptanoic acid, methyl ester                                          | $C_{13}H_{26}O_7$       | 3.079  |
| 8   | 27.302            | 1,2,4-Tri-O-acetyl-3,5-di-O-methylribitol                                                   | $C_{13}H_{22}O_8$       | 3.338  |
| 9   | 32.927            | Methyl tetradecanoate                                                                       | $C_{15}H_{30}O_2$       | 16.402 |
| 10  | 34.086            | (5-Isopropyl-3,4-dimethoxy-2,4,6-cycloheptatrienylidene)malononitrile                       | $C_{15}H_{16}N_2O_2$    | 0.000  |
| 11  | 35.543            | Acetic acid, (4,5,6,7-tetrahydro-1-cyano-3-methylthio-2-benzothiophen-5-ylideneamino) ester | $C_{12}H_{12}N_2O_2S_2$ | 1.060  |
| 12  | 36.048            | Oxalamic acid, N-[4-(3,4-dimethoxyphenyl)tetrahydropyran-4-ylmethyl]-, ethyl ester          | $C_{18}H_{25}NO_6$      | 1.513  |
| 13  | 37.309            | Chromone, 5-hydroxy-6,7,8-trimethoxy-2,3-dimethyl-                                          | $C_{14}H_{16}O_6$       | 1.629  |

|    |        |                                       |                                                       |        |
|----|--------|---------------------------------------|-------------------------------------------------------|--------|
| 14 | 38.064 | Hexadecanoic acid, methyl ester       | C <sub>17</sub> H <sub>34</sub> O <sub>2</sub>        | 18.529 |
| 15 | 42.143 | 16-Octadecenoic acid, methyl ester    | C <sub>19</sub> H <sub>36</sub> O <sub>2</sub>        | 1.562  |
| 16 | 42.744 | Methyl stearate                       | C <sub>19</sub> H <sub>38</sub> O <sub>2</sub>        | 11.360 |
| 17 | 46.472 | Butanoic acid                         | C <sub>28</sub> H <sub>38</sub> Cl<br>2O <sub>8</sub> | 2.334  |
| 18 | 52.311 | Octadecane, 3-ethyl-5-(2-ethylbutyl)- | C <sub>26</sub> H <sub>54</sub>                       | 1.400  |

**Table S4** the information of the pyrolysis products of sample #R-2.

| No. | RT/min | Pyrolysis products identified                                                   | Formula                                                      | Area/% |
|-----|--------|---------------------------------------------------------------------------------|--------------------------------------------------------------|--------|
| 1   | 10.345 | 6-Heptenoic acid, methyl ester                                                  | C <sub>8</sub> H <sub>14</sub> O <sub>2</sub>                | 2.316  |
| 2   | 11.207 | 2-Cyclopenten-1-one, 2,3-dimethyl-                                              | C <sub>7</sub> H <sub>10</sub> O                             | 1.928  |
| 3   | 12.527 | Bicyclo[2.2.1]heptane-2,5-diol, 1,7,7-trimethyl-, (2-endo,5-exo)-               | C <sub>10</sub> H <sub>18</sub> O <sub>2</sub>               | 0.882  |
| 4   | 12.896 | 2-Ethyl-3-methylcyclopent-2-en-1-one                                            | C <sub>8</sub> H <sub>12</sub> O                             | 0.503  |
| 5   | 13.871 | 3-Octenoic acid, methyl ester, (Z)-                                             | C <sub>9</sub> H <sub>16</sub> O <sub>2</sub>                | 0.632  |
| 6   | 13.847 | 13,16-Octadecadiynoic acid, methyl ester                                        | C <sub>19</sub> H <sub>30</sub> O <sub>2</sub>               | 1.786  |
| 7   | 14.198 | Octanoic acid, methyl ester                                                     | C <sub>9</sub> H <sub>18</sub> O <sub>2</sub>                | 3.060  |
| 8   | 14.692 | Pentanedioic acid, dimethyl ester                                               | C <sub>7</sub> H <sub>12</sub> O <sub>4</sub>                | 2.151  |
| 9   | 16.505 | R-Limonene                                                                      | C <sub>10</sub> H <sub>16</sub> O <sub>3</sub>               | 0.543  |
| 10  | 17.564 | 2,4-Imidazolidinedione, 3,5,5-trimethyl-                                        | C <sub>6</sub> H <sub>10</sub> N <sub>2</sub> O <sub>2</sub> | 1.982  |
| 11  | 17.712 | Nonanoic acid, methyl ester                                                     | C <sub>10</sub> H <sub>20</sub> O <sub>2</sub>               | 1.964  |
| 12  | 18.426 | Hexanedioic acid, dimethyl ester                                                | C <sub>8</sub> H <sub>14</sub> O <sub>4</sub>                | 1.243  |
| 13  | 21.815 | Heptanedioic acid, dimethyl ester                                               | C <sub>9</sub> H <sub>16</sub> O <sub>4</sub>                | 0.788  |
| 14  | 22.071 | Pyrrolizin-1,7-dione-6-carboxylic acid, methyl(ester)                           | C <sub>9</sub> H <sub>11</sub> NO <sub>4</sub>               | 0.392  |
| 15  | 23.212 | L-Proline, N-(methoxycarbonyl)-, methyl ester                                   | C <sub>8</sub> H <sub>13</sub> NO <sub>4</sub>               | 1.594  |
| 16  | 24.723 | 12-Hydroxy-14-methyl-oxa-cyclotetradec-6-en-2-one                               | C <sub>14</sub> H <sub>24</sub> O <sub>3</sub>               | 2.499  |
| 17  | 25.061 | Octanedioic acid, dimethyl ester                                                | C <sub>10</sub> H <sub>18</sub> O <sub>4</sub>               | 8.845  |
| 18  | 25.727 | Heptan-2-ol, 5-(2-tetrahydrofurfuryl)-                                          | C <sub>12</sub> H <sub>24</sub> O <sub>2</sub>               | 2.196  |
| 19  | 25.769 | Oxiraneoctanoic acid, 3-octyl-, cis-                                            | C <sub>18</sub> H <sub>34</sub> O <sub>3</sub>               | 0.913  |
| 20  | 27.642 | s-Indacene, 1,2,3,5,6,7-hexahydro-1,1,7,7-tetramethyl-                          | C <sub>16</sub> H <sub>22</sub>                              | 2.311  |
| 21  | 28.147 | Nonanedioic acid, dimethyl ester                                                | C <sub>11</sub> H <sub>20</sub> O <sub>4</sub>               | 27.756 |
| 22  | 30.966 | Decanedioic acid, dimethyl ester                                                | C <sub>12</sub> H <sub>22</sub> O <sub>4</sub>               | 4.663  |
| 23  | 31.638 | 9,12,15-Octadecatrienoic acid, 2,3-dihydroxypropyl ester, (Z,Z,Z)-              | C <sub>21</sub> H <sub>36</sub> O <sub>4</sub>               | 1.648  |
| 24  | 34.337 | Methyl (12Z,15Z)-9,10,11-trimethoxyoctadeca-12,15-dienoate                      | C <sub>22</sub> H <sub>40</sub> O <sub>5</sub>               | 3.581  |
|     |        | Aleuritic acid, methyl ester, trimethyl ether                                   | C <sub>20</sub> H <sub>40</sub> O <sub>5</sub>               | 0.000  |
| 25  | 36.085 | Pyrano[4,3-b]benzopyran-1,9-dione, 5a-methoxy-9a-methyl-3-(1-propenyl)perhydro- | C <sub>17</sub> H <sub>24</sub> O <sub>5</sub>               | 2.686  |
| 26  | 38.149 | Hexadecanoic acid, methyl ester                                                 | C <sub>17</sub> H <sub>34</sub> O <sub>2</sub>               | 3.991  |
| 27  | 38.523 | 17a-Ethyl-3β-methoxy-17a-aza-D-homoandrost-5-ene-17-one                         | C <sub>22</sub> H <sub>35</sub> NO <sub>2</sub>              | 0.753  |
| 28  | 41.770 | Pregn-4-ene-3,20-dione, 11-hydroxy-, (11α)-                                     | C <sub>21</sub> H <sub>30</sub> O <sub>3</sub>               | 0.784  |

|    |        |                                                                                                                                                    |                                                 |       |
|----|--------|----------------------------------------------------------------------------------------------------------------------------------------------------|-------------------------------------------------|-------|
| 29 | 42.246 | 2-[4-methyl-6-(2,6,6-trimethylcyclohex-1-enyl)hexa-1,3,5-trienyl]cyclohex-1-en-1-carboxaldehyde                                                    | C <sub>23</sub> H <sub>32</sub> O               | 1.336 |
| 30 | 42.840 | Heptadecanoic acid, 16-methyl-, methyl ester                                                                                                       | C <sub>19</sub> H <sub>38</sub> O <sub>2</sub>  | 3.603 |
| 31 | 43.256 | Nonanoic acid, 9-(o-propylphenyl)-, methyl ester                                                                                                   | C <sub>19</sub> H <sub>30</sub> O <sub>2</sub>  | 2.565 |
| 32 | 44.202 | Ethyl iso-allocholate                                                                                                                              | C <sub>26</sub> H <sub>44</sub> O <sub>5</sub>  | 0.534 |
| 33 | 45.207 | Fluoxymesterone                                                                                                                                    | C <sub>20</sub> H <sub>29</sub> FO <sub>3</sub> | 0.806 |
| 34 | 46.027 | Ursodeoxycholic acid                                                                                                                               | C <sub>24</sub> H <sub>40</sub> O <sub>4</sub>  | 0.748 |
| 35 | 46.158 | Oxiraneoctanoic acid, 3-octyl-, cis-                                                                                                               | C <sub>18</sub> H <sub>34</sub> O <sub>3</sub>  | 4.080 |
| 36 | 48.899 | d-Allo-dec-2-enonic acid, 5,8-anhydro-2,3,4,9-tetradecoxy-8-C-(hydroxymethyl)-3-methyl-7,8-O-(1-methylethylidene)-, methyl ester, 10-acetate, (E)- | C <sub>18</sub> H <sub>28</sub> O <sub>8</sub>  | 1.937 |

**Table S5** the information of the pyrolysis products of sample #R-3.

| #  | RT/min        | Pyrolysis products identified                                | Formula                                                       | Area/% |
|----|---------------|--------------------------------------------------------------|---------------------------------------------------------------|--------|
| 1  | 10.831        | Butanedioic acid, dimethyl ester                             | C <sub>6</sub> H <sub>10</sub> O <sub>4</sub>                 | 0.886  |
| 2  | 12.008        | Butanedioic acid, methyl-, dimethyl ester                    | C <sub>7</sub> H <sub>12</sub> O <sub>4</sub>                 | 0.424  |
| 3  | 13.828        | 1,2-Ethanediamine, N,N,N',N'-tetramethyl-                    | C <sub>6</sub> H <sub>16</sub> N <sub>2</sub>                 | 1.736  |
| 4  | 16.855        | N,N'-Ethylenenebis(N-ethylglycine)                           | C <sub>10</sub> H <sub>20</sub> N <sub>2</sub> O <sub>4</sub> | 0.883  |
| 5  | 17.622        | Razoxane                                                     | C <sub>11</sub> H <sub>16</sub> N <sub>4</sub> O <sub>4</sub> | 1.023  |
| 6  | 17.717        | Creatine                                                     | C <sub>4</sub> H <sub>9</sub> N <sub>3</sub> O <sub>2</sub>   | 12.031 |
| 7  | 18.353        | 1,4-Bis(3-aminopropyl)piperazine                             | C <sub>10</sub> H <sub>24</sub> N <sub>4</sub>                | 0.436  |
| 8  | 22.658/25.007 | Pyrrolizin-1,7-dione-6-carboxylic acid, methyl(ester)        | C <sub>9</sub> H <sub>11</sub> NO <sub>4</sub>                | 1.148  |
| 9  | 23.145        | 1-Pyridinepropanoic acid, hexahydro-3-(hydroxymethyl)-       | C <sub>9</sub> H <sub>17</sub> NO <sub>3</sub>                | 0.905  |
| 10 | 25.232        | Dimethyl phthalate                                           | C <sub>10</sub> H <sub>10</sub> O <sub>4</sub>                | 1.26   |
| 11 | 26.053/26.897 | 1,2,4-Tri-O-acetyl-3,5-di-O-methylribitol                    | C <sub>13</sub> H <sub>22</sub> O <sub>8</sub>                | 0.51   |
| 12 | 26.612        | 1,4-Benzenedicarboxylic acid, dimethyl ester                 | C <sub>10</sub> H <sub>10</sub> O <sub>4</sub>                | 0.933  |
| 13 | 27.617        | Acetamide, N-methyl-N-[4-(3-hydroxypyrrolidinyl)-2-butynyl]- | C <sub>11</sub> H <sub>18</sub> N <sub>2</sub> O <sub>2</sub> | 0.531  |
| 14 | 28.045        | Nonanedioic acid, dimethyl ester                             | C <sub>11</sub> H <sub>20</sub> O <sub>4</sub>                | 0.871  |
| 15 | 32.243/33.087 | N,N'-Bis(Carbobenzyloxy)-lysine methyl(ester)                | C <sub>23</sub> H <sub>28</sub> N <sub>2</sub> O <sub>6</sub> | 0.161  |
| 16 | 34.746        | Benzofuran, 5,7-dichloro-2-methyl-                           | C <sub>9</sub> H <sub>6</sub> Cl <sub>2</sub> O               | 0.064  |
| 17 | 38.064        | Hexadecanoic acid, methyl ester                              | C <sub>17</sub> H <sub>34</sub> O <sub>2</sub>                | 4.858  |
| 18 | 42.149        | 16-Octadecenoic acid, methyl ester                           | C <sub>19</sub> H <sub>36</sub> O <sub>2</sub>                | 0.636  |
| 19 | 42.750        | Methyl stearate                                              | C <sub>19</sub> H <sub>38</sub> O <sub>2</sub>                | 3.631  |
